# Supplementary material
Source: publisher figshare collection journal article supplement (https://asha.figshare.com/articles/dataset/_/27122064)
Supplement: Supplementary file 1 [file 1]

**Supplemental Material S6.** Fitted linear mixed effect model for BVPA (blood volume pulse amplitude).

| <i>Predictors</i>                                    | <i>Estimates</i> | <b>value</b>  |              |
|------------------------------------------------------|------------------|---------------|--------------|
|                                                      |                  | <i>CI</i>     | <i>p</i>     |
| (Intercept)                                          | -0.38 *          | -0.72 – -0.04 | <b>0.028</b> |
| Time                                                 | 0.18             | -0.01 – 0.37  | 0.067        |
| Session Type                                         | 0.10             | -0.09 – 0.29  | 0.285        |
| <b>Random Effects</b>                                |                  |               |              |
| $\sigma^2$                                           | 0.08             |               |              |
| T00 ID                                               | 0.03             |               |              |
| ICC                                                  | 0.27             |               |              |
| N ID                                                 | 10               |               |              |
| Observations                                         | 37               |               |              |
| Marginal R <sup>2</sup> / Conditional R <sup>2</sup> | 0.092 / 0.339    |               |              |
| * $p < 0.05$ ** $p < 0.01$ *** $p < 0.001$           |                  |               |              |
