# Supplementary material
Source: publisher figshare collection journal article supplement (https://asha.figshare.com/articles/dataset/_/27122064)
Supplement: Supplementary file 2 [file 1]

**Supplemental Material S1.** Five-grade scale with emoticons.

**HOW DIFFICULT WAS THE TEST?**

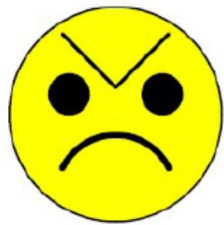

**1 = Very Much**

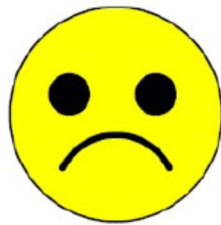

**2 = Much**

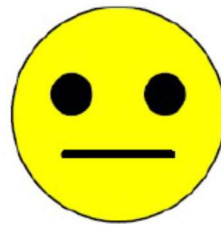

**3 = Intermediate**

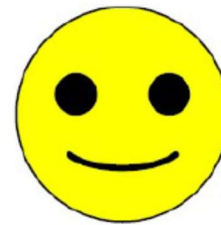

**4 = A Bit**

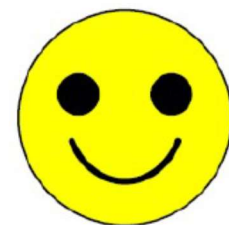

**5 = Not at All**
