# Supplementary material
Source: publisher figshare collection journal article supplement (https://asha.figshare.com/articles/dataset/_/27122064)
Supplement: Supplementary file 3 [file 1]

**Supplemental Material S5.** The multinomial logistic regression with mixed effects model for child self-reports.

| <i>Predictors</i>                                    | <b>value</b>       |             |              |
|------------------------------------------------------|--------------------|-------------|--------------|
|                                                      | <i>Odds Ratios</i> | <i>CI</i>   | <i>p</i>     |
| Session Type                                         | 1.08               | 0.29 – 4.07 | 0.907        |
| Time                                                 | 0.51 *             | 0.27 – 0.96 | <b>0.038</b> |
| <b>Random Effects</b>                                |                    |             |              |
| $\sigma^2$                                           | 3.29               |             |              |
| T <sub>00</sub> ID                                   | 2.77               |             |              |
| ICC                                                  | 0.46               |             |              |
| N <sub>ID</sub>                                      | 10                 |             |              |
| Observations                                         | 40                 |             |              |
| Marginal R <sup>2</sup> / Conditional R <sup>2</sup> | 0.087 / 0.504      |             |              |
| * $p < 0.05$ ** $p < 0.01$ *** $p < 0.001$           |                    |             |              |
