# Supplementary material
Source: publisher figshare collection journal article supplement (https://asha.figshare.com/articles/dataset/_/27122064)

**Supplemental Material S3.** A sample recording of (a) the raw and detrended EDA (electrodermal activity) signal and (b) the raw BVPA (blood volume pulse amplitude) signal.

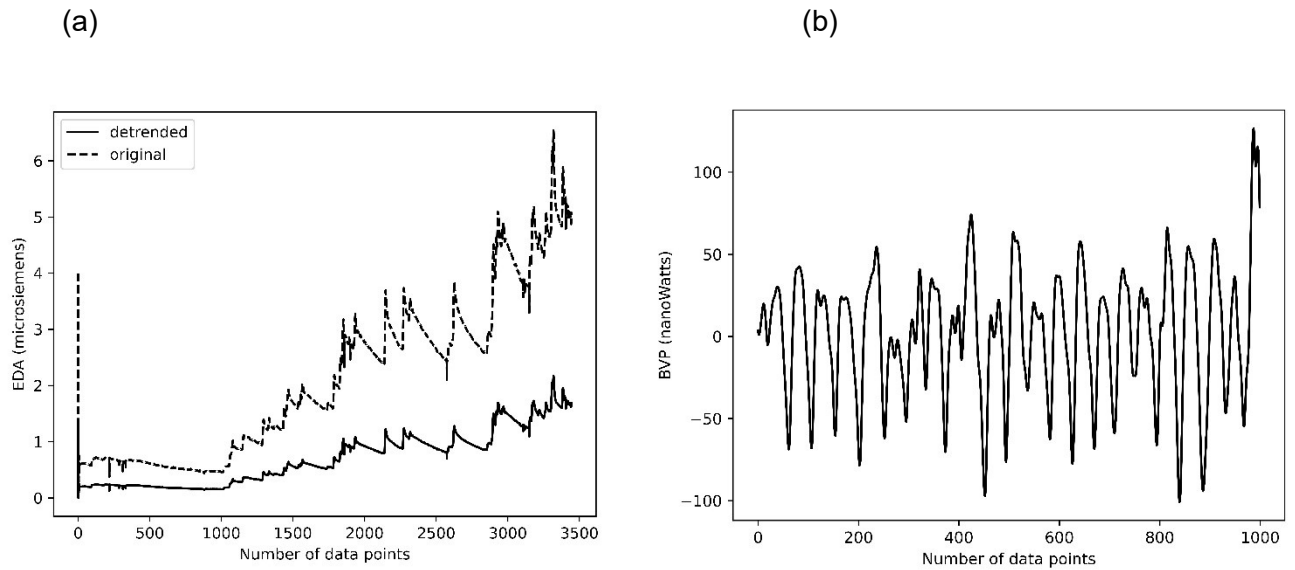

Supplement: Supplementary file 4 [file 1]
