# Supplementary material
Source: publisher figshare collection journal article supplement (https://asha.figshare.com/articles/dataset/_/27122064)
Supplement: Supplementary file 5 [file 1]

**Supplemental Material S8.** Relationships between (a) self-reported and physiological (EDA, BVPA) measures of LE; self-reported measures of LE and the proportion of correct responses and (b) the proportion of correct responses and physiological (EDA, BVPA) measures of LE.

(a)

|              |                   | Estimates | Standard Error | z-value | df | p-value |
|--------------|-------------------|-----------|----------------|---------|----|---------|
| Self-Reports | EDA               | 0.18      | 0.55           | 0.33    |    | 0.74    |
|              | BVPA              | -0.20     | 1.23           | -0.17   |    | 0.87    |
|              | Correct Responses | -5.73     | 1.85           | -3.09   |    | 0.002   |

(b)

|                   |      | Estimates | Standard Error | t-value | df | p-value |
|-------------------|------|-----------|----------------|---------|----|---------|
| Correct Responses | EDA  | 0.04      | 0.05           | 0.87    | 34 | 0.39    |
|                   | BVPA | 0.13      | 0.12           | 0.27    | 35 | 0.79    |

Note: LE = listening effort, Correct Responses = proportion of correct responses, EDA = electrodermal activity, BVPA = blood volume pulse amplitude.
