# Supplementary material
Source: publisher figshare collection journal article supplement (https://asha.figshare.com/articles/dataset/_/27122064)
Supplement: Supplementary file 6 [file 1]

**Supplemental Material S7.** Fitted linear mixed effect model for the proportion of correct responses.

| <i>Predictors</i>                                    | <b>value</b>     |              |                  |
|------------------------------------------------------|------------------|--------------|------------------|
|                                                      | <i>Estimates</i> | <i>CI</i>    | <i>p</i>         |
| (Intercept)                                          | 0.62 ***         | 0.47 – 0.76  | <b>&lt;0.001</b> |
| Session Type                                         | 0.06             | -0.07 – 0.20 | 0.340            |
| Time                                                 | 0.09             | -0.04 – 0.23 | 0.166            |
| <b>Random Effects</b>                                |                  |              |                  |
| $\sigma^2$                                           | 0.05             |              |                  |
| T00 ID                                               | 0.02             |              |                  |
| ICC                                                  | 0.28             |              |                  |
| N ID                                                 | 10               |              |                  |
| Observations                                         | 40               |              |                  |
| Marginal R <sup>2</sup> / Conditional R <sup>2</sup> | 0.052 / 0.315    |              |                  |
| * $p < 0.05$ ** $p < 0.01$ *** $p < 0.001$           |                  |              |                  |
