# Supplementary material
Source: publisher figshare collection journal article supplement (https://asha.figshare.com/articles/dataset/_/27122064)
Supplement: Supplementary file 7 [file 1]

**Supplemental Material S4.** Fitted linear mixed effect model for EDA (electrodermal activity).

| <i>Predictors</i>                                    | <b>value</b>     |              |              |
|------------------------------------------------------|------------------|--------------|--------------|
|                                                      | <i>Estimates</i> | <i>CI</i>    | <i>p</i>     |
| (Intercept)                                          | 1.47 **          | 0.56 – 2.37  | <b>0.002</b> |
| Time                                                 | -0.46            | -0.98 – 0.06 | 0.084        |
| Session Type                                         | 0.00             | -0.51 – 0.52 | 0.998        |
| <b>Random Effects</b>                                |                  |              |              |
| $\sigma^2$                                           | 0.59             |              |              |
| T <sub>00</sub> ID                                   | 0.13             |              |              |
| ICC                                                  | 0.18             |              |              |
| N <sub>ID</sub>                                      | 10               |              |              |
| Observations                                         | 37               |              |              |
| Marginal R <sup>2</sup> / Conditional R <sup>2</sup> | 0.069 / 0.240    |              |              |
| * $p < 0.05$ ** $p < 0.01$ *** $p < 0.001$           |                  |              |              |
