# Supplementary material
Source: publisher figshare collection journal article supplement (https://asha.figshare.com/articles/dataset/_/27122064)
Supplement: Supplementary file 8 [file 1]

**Supplemental Material S2.** Standard scores and percentile ranks for each child.

|                 | CLS        | RLI        | ELI         | LCI         | LMI          |
|-----------------|------------|------------|-------------|-------------|--------------|
| Standard Score  |            |            |             |             |              |
| Sub1            | 81         | 84         | 73          | 78          | 78           |
| Sub2            | 98         | 100        | 98          | 89          | 105          |
| Sub3            | 102        | 103        | 102         | 93          | 100          |
| Sub4            | 125        | 133        | 124         | 106         | 118          |
| Sub5            | 113        | 113        | 120         | 114         | 120          |
| Sub6            | 98         | 103        | 82          | 93          | 93           |
| Sub7            | 73         | 67         | 70          | 63          | 73           |
| Sub8            | 111        | 102        | 104         | 89          | 113          |
| Sub9            | 90         | 115        | 83          | 106         | 90           |
| Sub10           | 102        | 103        | 91          | 114         | 100          |
| mean (s.d.)     | 102.8 (15) | 106 (16.2) | 99.8 (20.2) | 95.5 (12.8) | 102.3 (15.8) |
| Percentile Rank |            |            |             |             |              |
| Sub1            | 10         | 14         | 4           | 7           | 7            |
| Sub2            | 45         | 50         | 45          | 23          | 63           |
| Sub3            | 55         | 58         | 55          | 32          | 50           |
| Sub4            | 95         | 99         | 95          | 66          | 88           |
| Sub5            | 81         | 81         | 91          | 82          | 91           |
| Sub6            | 45         | 58         | 12          | 32          | 32           |
| Sub7            | 4          | 1          | 2           | 1           | 4            |
| Sub8            | 77         | 55         | 61          | 23          | 81           |
| Sub9            | 25         | 84         | 13          | 66          | 25           |
| Sub10           | 55         | 58         | 27          | 82          | 50           |
| mean (s.d.)     | 55.2 (30)  | 60 (28.9)  | 50.3 (38.3) | 40.3 (28.1) | 55.2 (32.6)  |

Note: CLS = Core Language Score; RLI = Receptive Language Index; ELI = Expressive Language Index; LCI = Language Content Index; LMI = Language Memory Index.
